# Supplementary material
Source: Springer Nature journal article supplement (https://www.springermedizin.de/resource/supplementary/12947_2008_257_MOESM1_ESM.pdf/9556556)

Chi-Square

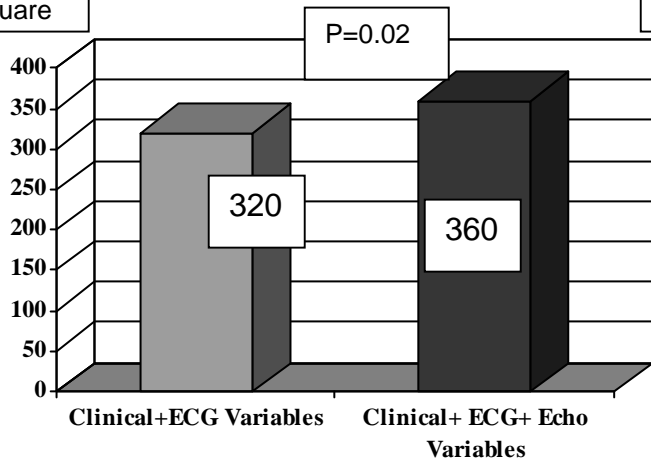

a

Chi-Square

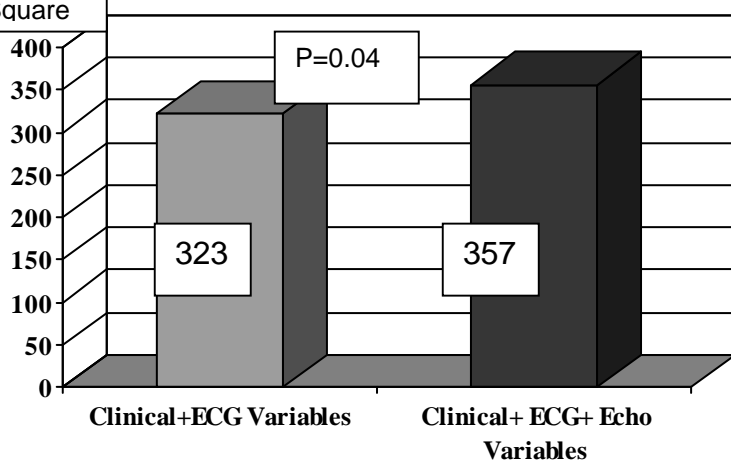

b

Supplement: MOESM1 [file 9556556]
